1 **The X chromosome is a potential polarising signal for asymmetric cell**  
2 **divisions in meiotic cells of a nematode**

3

4 Talal Alyazeedi<sup>1, 3</sup>, Emily Xu<sup>2,3</sup>, Jasmin Kaur<sup>1</sup>, Diane Shakes<sup>2#</sup>, Andre Pires-daSilva<sup>1#</sup>

5

6 <sup>1</sup> School of Life Sciences, University of Warwick, Coventry, CV4 7AL, UK

7 <sup>2</sup> Department of Biology, William & Mary, Williamsburg, VA 23187, USA

8 <sup>3</sup> Co-first authors

9 # Corresponding authors: [dcshak@wm.edu](mailto:dcshak@wm.edu), [andre.pires@warwick.ac.uk](mailto:andre.pires@warwick.ac.uk)

10

11

12 **ABSTRACT**

13 The unequal partition of molecules and organelles during cell division results in  
14 daughter cells with different fates. Asymmetric cell divisions have been best  
15 characterised in systems in which extrinsic signals polarise the mother cell during  
16 cell division. However, the mechanisms of asymmetric cell division mediated by  
17 intrinsic signals, and the nature of these signals, are mostly unknown. Here we  
18 report an asymmetric cell division in the nematode *Auanema rhodensis* that may be  
19 cued by the X chromosome. In the wildtype XO male, the spermatocyte divides  
20 asymmetrically to generate X-bearing spermatids that inherit components necessary  
21 for sperm viability, and nullo-spermatids that inherits components to be discarded.  
22 We found that in XX mutant pseudomales, sperm components co-segregate with the  
23 X chromosome, supporting the hypothesis that the X chromosome is employed as a  
24 polarising signal for partitioning essential cytoplasmic components for sperm  
25 function.

26

27

28

29

30

31

32

33

34

## 35 INTRODUCTION

36 An asymmetric cell division (ACD) is a division that results in sister cells with  
37 different sizes, morphology, chemical composition, or gene expression. ACDs are  
38 present in both unicellular and multicellular organisms, are crucial for embryonic  
39 development, cellular differentiation, and production of cell diversity (Gönczy, 2008;  
40 Venkei and Yamashita, 2018), whereas their dysregulation may result in  
41 tumorigenesis (Knoblich, 2010; Neumuller and Knoblich, 2009).

42

43 The polarity of a dividing cell is established by extrinsic or intrinsic factors. The best-  
44 known examples are the cases in which extrinsic signals provided by neighbouring  
45 cells polarise the dividing cell (Fuller and Spradling, 2007). Relatively little is known  
46 about intrinsic mechanisms controlling the polarity of an asymmetric dividing cell  
47 (Freisinger et al., 2013). We have previously described a cell division that undergoes  
48 asymmetric segregation that is likely to be guided by internal mechanisms. This  
49 division occurs during the final division of the male spermatogenesis in the nematode  
50 *Auanema rhodensis* (aka, *Rhabditis* sp. SB347) (Shakes et al., 2011; Winter et al.,  
51 2017).

52

53 Spermatogenesis is very well characterized in the nematode *Caenorhabditis*  
54 *elegans*. During the maturation of the spermatids, non-essential cytoplasmic  
55 components are extruded into vesicles named residual bodies (Fig. 1A). Thus, the  
56 final product of an XO spermatocyte division and differentiation is the formation of  
57 four spermatids, two spermatids with no X chromosomes (nullo-X spermatids) and  
58 two spermatids with one X chromosome each (X-bearing spermatids) (Fig. 1A).  
59 Unexpectedly, spermatogenesis in *A. rhodensis* results in only two viable gametes,  
60 each containing either one X chromosome (XO male, Fig. 1B) or two X  
61 chromosomes (Shakes et al., 2011; Tandonnet et al., 2018) (XX hermaphrodite, Fig.  
62 1C). In *A. rhodensis* the non-essential sperm components are discarded into the  
63 nullo-X spermatids because of asymmetric partitioning of the cytoplasm during  
64 anaphase II (Fig. 1D) (Shakes et al., 2011; Winter et al., 2017). Thus, the nullo-X  
65 spermatids become cellular residual bodies.

66

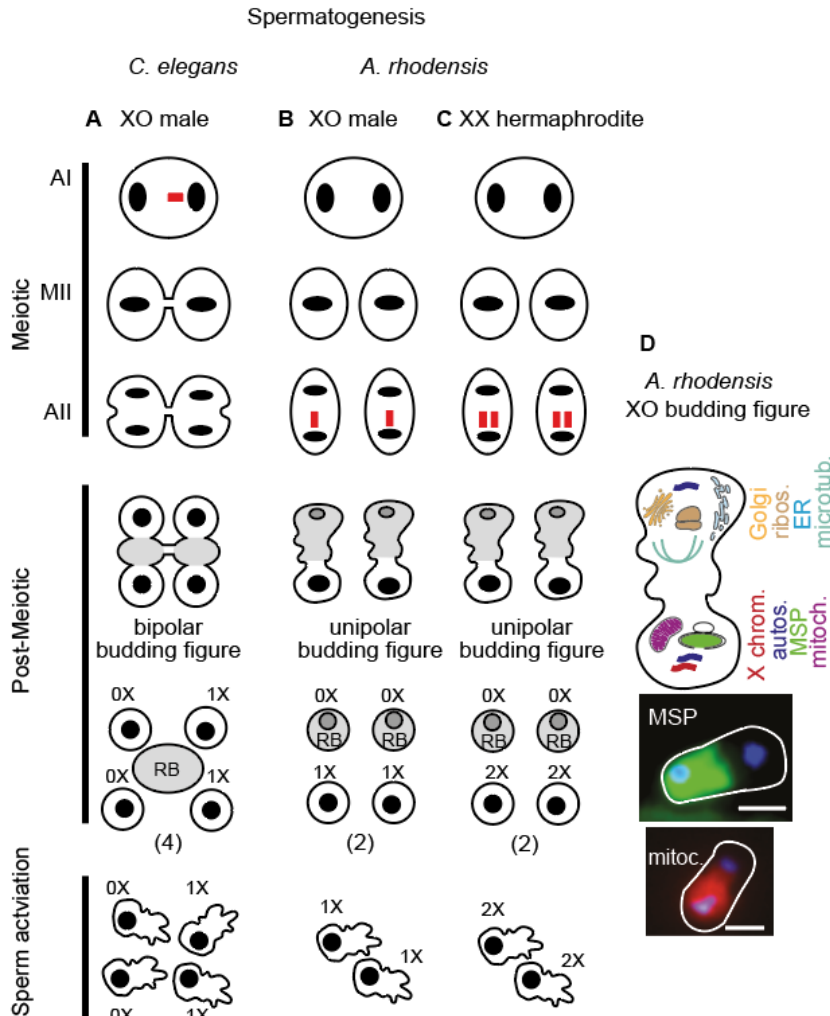

67

68 **Figure 1. Comparison of spermatogenesis between *C. elegans* and *A. rhodensis*.** In *C.*  
69 *elegans* males (**A**), the unpaired X chromosome (in red) lags during anaphase I, leading to  
70 the formation of two secondary spermatocytes that divide symmetrically to generate either  
71 two gametes with 1X or two gametes containing only autosomes (0X). A central residual  
72 body (RB) is formed in the postmeiotic phase. In *A. rhodensis* males (**B**), the sister  
73 chromatids of the X chromosome separate prematurely in meiosis I and the X chromosome  
74 lags during anaphase II. High rates of non-disjunction in *A. rhodensis* hermaphrodite  
75 spermatogenesis leads to the formation of 2X sperm (**C**). Only two functional gametes are  
76 formed during spermatogenesis of *A. rhodensis* (**B, C**), with the nullo-X sperm acting as a  
77 residual body. Cytoplasmic components partition during the second meiotic division (**D**),  
78 whereby specific organelles and proteins partition in opposite directions. Mitochondria and  
79 the sperm cytoskeleton protein Major Sperm Protein (MSP) partition with the X chromosome  
80 to one of the poles of the cell, whereas ribosomes, Golgi complex, and microtubules migrate  
81 to the opposite side of the dividing cell, which has only autosomes (Winter et al., 2017).

82

83 We hypothesized that the *A. rhodensis* X chromosome acts as a polarizing signal,  
84 guiding the partitioning of sperm-specific cytoplasmic contents to one of the poles of  
85 the dividing secondary spermatocyte. As a result of this ACD during  
86 spermatogenesis, *A. rhodensis* males and other species of the same genus produce  
87 mostly X-bearing sperm (Chaudhuri et al., 2015; Shakes et al., 2011; Winter et al.,  
88 2017). Thus, crosses between males and females result mostly in XX progeny,  
89 which can be either female or hermaphrodite (Chaudhuri et al., 2011a).  
90 Hermaphrodites, which produce nullo-X oocytes and XX-sperm, produce mostly XX  
91 self-progeny. To determine if the X chromosome acts as a polarizing signal, we  
92 isolated a sex determination mutant that is phenotypic male but that harbours two X  
93 chromosomes. We show that sperm components co-segregate with the X  
94 chromosome, further supporting that this chromosome acts as a polarizing signal.

95

## 96 **MATERIALS AND METHODS**

### 97 **Nematodes strains and cultures**

98 The *Auanema rhodensis* inbred strains APS4 and APS6 (Tandonnet et al., 2018)  
99 were maintained according to standard conditions for *C. elegans*, at 20 °C  
100 (Stiernagle, 2006). Nematodes were cultured on NGM plates seeded with the  
101 *Escherichia coli* strain OP50 or with the *E. coli* streptomycin-resistant strain OP50-1.

102

### 103 **Mutagenesis**

104 *A. rhodensis* APS4 was mutagenized with the chemical mutagen ethyl  
105 methanesulfonate (EMS), as previously described (Chaudhuri et al., 2011b; Pires-  
106 daSilva and Sommer, 2004). To screen for a masculinizing phenotype (XX  
107 pseudomales), we isolated 521 F1 hermaphrodites derived from mutagenized P0s  
108 and transferred them to single plates to let them self-fertilize. To simplify screening  
109 for mutants that generate high rates of (pseudo)males, we screened for F2s derived  
110 from 3-day old hermaphrodites. We adopted this procedure because hermaphrodites  
111 of this age tend to generate less XO self-offspring (~3%) than younger  
112 hermaphrodites (~8%) (Chaudhuri et al., 2015). From plates in which potential  
113 pseudomale mutants were found (containing ~25% of phenotypic males), 10-15  
114 sister hermaphrodites were isolated to single plates to maintain the mutations as a  
115 heterozygous strain. Heterozygous hermaphrodites were selected based on the

116 production of excess male progeny, which is consistent with the anticipated  
117 production of 25% XX male progeny

118

### 119 ***A. rhodensis* masculiniser (*Arh-mas-1*) crosses**

120 The *A. rhodensis* masculiniser was named *Arh-mas-1(brz-3)*, following the  
121 nomenclature described in Wormbase ([www.wormbase.org](http://www.wormbase.org)). *Arh-mas-1(brz-3)* was  
122 backcrossed with the wildtype APS4 for three generations to remove background  
123 mutations generated during the mutagenesis.

124

125 To ascertain that the pseudo male has two X chromosomes, we crossed it to the  
126 polymorphic strain APS6. *Arh-mas-1* crosses with APS6 females were performed for  
127 ~24 h at 20 °C. To isolate females for crosses, we left a 1-day old hermaphrodite to  
128 lay eggs, which were picked to individual wells of a 24-well plate. After 72 hours,  
129 those eggs develop into males, females or hermaphrodites. Females were  
130 distinguished from males by their tail morphology, and from hermaphrodites by their  
131 inability to self-fertilize (Kanzaki et al., 2017).

132

### 133 **Single nematode genotyping**

134 The X chromosome genetic markers (markers 9686 and 12469) generated for *A.*  
135 *rhodensis* (Tandonnet et al., 2019), together with the primer sequences, restriction  
136 enzymes and fragment sizes are detailed in  
137 [https://data.mendeley.com/datasets/63d7rrrx28/3#file-16ff094d-6c74-478a-a3f5-](https://data.mendeley.com/datasets/63d7rrrx28/3#file-16ff094d-6c74-478a-a3f5-8878e89fd72f)  
138 [8878e89fd72f](https://data.mendeley.com/datasets/63d7rrrx28/3#file-16ff094d-6c74-478a-a3f5-8878e89fd72f).

139

### 140 **Antibody staining**

141 To detect the ER, we used an antibody against cytochrome P450 (CYPP33-E1). For  
142 mitochondria, we used an antibody against the beta-subunit of ATP synthase.

143

## 144 **RESULTS**

### 145 ***Arh-mas-1* has a male phenotype and XX karyotype**

146 We performed chemical mutagenesis in *A. rhodensis* to screen for a masculinizing  
147 sex determination mutant. This mutant would allow us to determine whether the X  
148 chromosome acts as a signal to partition the cytoplasm in dividing spermatocytes. If  
149 this hypothesis is correct, the expectation was that the two homologous X

150 chromosomes segregate to opposite poles in the first and second meiotic divisions,  
151 following a Mendelian pattern (Fig. 2A, Model 1), to generate viable 1X spermatids.  
152 Although *A. rhodensis* XX females follow the canonical meiosis, XX hermaphrodites  
153 do not: the X chromosomes undergo premature chromatid separation in the first  
154 meiotic division, forming viable 2X spermatids and non-viable nullo-X spermatids  
155 (Tandonnet et al., 2018). Thus, similar to hermaphrodites, pseudomales may follow  
156 the pattern found in hermaphrodite spermatogenesis (Fig. 2A, Model 2).  
157 Alternatively, those X chromatids may segregate equally to each pole to make viable  
158 1X sperm. A third possibility is that the two X chromosomes segregate to one pole in  
159 the first meiotic division, generating spermatocytes that either make only nullo-X  
160 spermatids or 0-4X spermatids. (Fig. 2A, Model 3). The fourth possibility is a mixture  
161 of Models 2 and 3. The hypothesis of the X chromosome acting as a polarising  
162 signal for cytoplasmic partitioning would be falsified in case the cellular components  
163 important for post-meiotic sperm do not co-segregate with the X chromosomes in  
164 anaphase II.

165

166 We found an XX *A. rhodensis* sex determination mutant (*Arh-mas-1*) with a male  
167 morphological phenotype that is almost indistinguishable from XO wildtype males  
168 (Fig. 2B-E). Adult *Arh-mas-1* XX pseudomales that are three days or older display a  
169 gut pigmentation pattern distinct from XO males (Fig. 2B), which we used as a  
170 marker to distinguish between the two karyotypes. *Arh-mas-1* pseudomales do not  
171 show signs of partial feminization, as encountered in similar mutants in other  
172 nematode species (Hill et al., 2006; Hodgkin, 1979; Pires-daSilva and Sommer,  
173 2004). *Arh-mas-1* pseudomales display mating behaviours and produce viable  
174 offspring when crossing with females (see below).

175



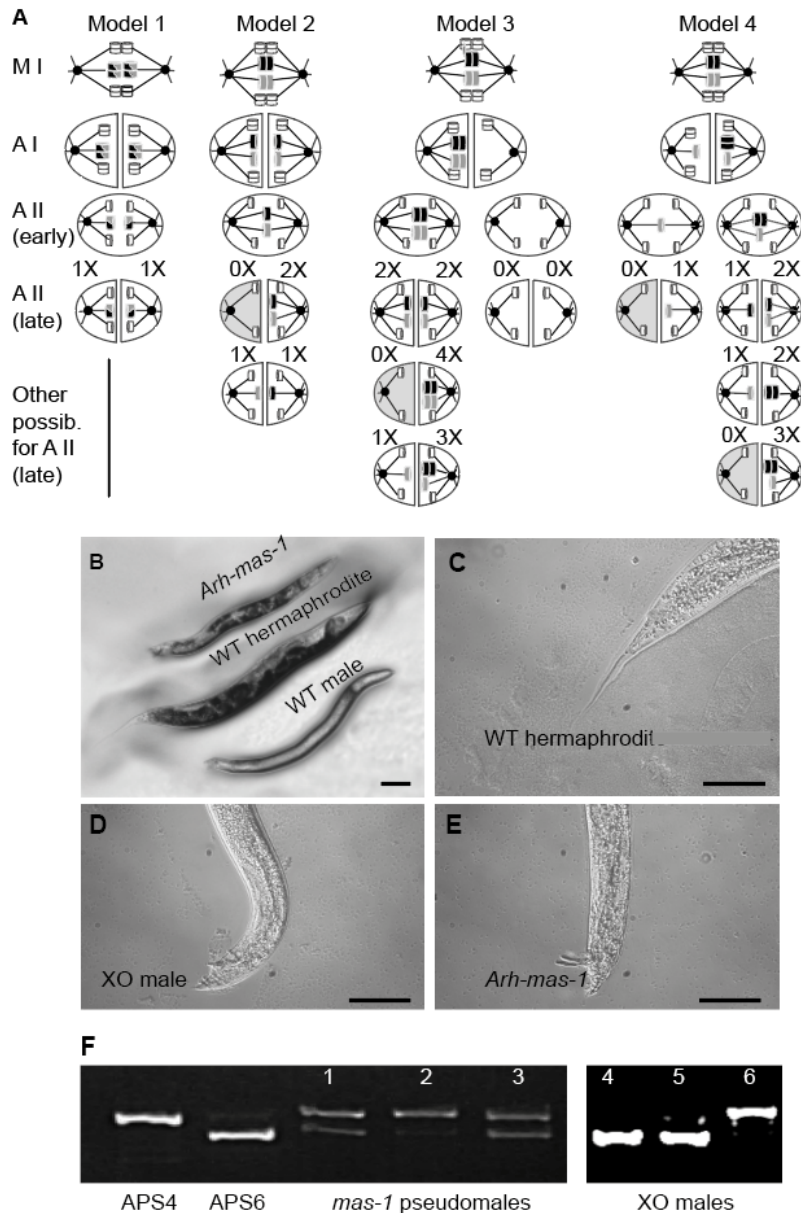

176

177

178 **Figure 2. *Arh-mas-1* masculinizes XX animals.** (A) Models for possible meiotic events in  
 179 XX pseudomales. Homologous X chromosomes are in grey and black, and autosomes are in  
 180 white. In the models, nullo-X sperm are discarded as residual bodies (grey cytoplasm) when  
 181 the sister cell has an X chromosome(s). (B) The *Arh-mas-1* pseudomale has a gut dark  
 182 pigmentation pattern distinct from the wildtype male. Bar, 10  $\mu$ m. The tail of the  
 183 hermaphrodite (C) is long and slender, whereas the male (D) and *Arh-mas-1* (E) are blunt  
 184 and with spicules. Bar, 50  $\mu$ m. (F) Genotyping of the X chromosome (chromosome marker  
 185 9686) in animals derived from crosses between pseudomales (APS4 background) and  
 186 females (APS6).

187

188 To confirm the XX karyotype of pseudomales, we crossed *Arh-mas-1* pseudomales  
189 (in APS4 background) with wildtype females (APS6 background). Using markers for  
190 the X chromosome, we genotyped pseudomales derived from self-progeny of F1  
191 hybrid hermaphrodites. We found that *Arh-mas-1* pseudomales were heterozygous  
192 for the X chromosome markers (Fig. 2F, samples 1-3), confirming that this is a strain  
193 with an XX karyotype.

194

### 195 ***Arh-mas-1* XX pseudomales produce 0-4X sperm**

196 In crosses between XX pseudomales and females, most of the F1 offspring is  
197 hermaphrodite or female (Fig. 3A), indicating that most of the *Arh-mas-1*  
198 spermatogenesis events generate viable 1X sperm. Cytological studies indicate that  
199 there is high variation in the way the X chromosomes segregate (Fig. 3B). In contrast  
200 to *C. elegans* (Fig. 1B), we never observed a lagging chromosome in anaphase I of  
201 *A. rhodensis* wildtype XO males. Instead, the unpaired X chromosome lags in  
202 anaphase II (Fig. 1B, Fig. 3B)(Shakes et al., 2011). Although the majority (66%,  
203 N=224) of the primary spermatocytes in XX pseudomales (*Arh-mas-1*) segregate  
204 DNA symmetrically, we also observed primary spermatocytes that segregate  
205 unequal amounts of DNA to the daughter cells (33%, N= 224). These occasional  
206 asymmetric cell divisions are supported by the observation of lagging X  
207 chromosomes during anaphase I (Fig. 3B). The different sizes of lagging  
208 chromosome masses could be due to (1) segregation of homologous X  
209 chromosomes to the same side, and (2) the premature separation of X chromatids in  
210 anaphase I (see models in Fig. 2A).

211

212 During anaphase II in spermatocytes of XX pseudomales, lagging chromosomes are  
213 also segregated symmetrically (59%, N= 54) (Fig. 3B) or asymmetrically (35%, N=  
214 54)(Fig. 3B). Chromosome-lagging has been attributed to the attachment of  
215 microtubules to both sides of an unpaired chromosome, delaying its segregation to  
216 one of the poles (Fabig et al., 2020).

217

218 About 1% of the F1s from XX pseudomales and females were dumpy animals (Fig.  
219 3A), possibly as the result of the fertilization of XX-sperm with an X-bearing oocyte.  
220 These dumpy animals are unlikely to be the result of background mutations because



221 the strain was backcrossed three times and because we have not observed dumpy  
222 phenotype offspring from hermaphrodites harbouring the *Arh-mas-1* mutation. In *C.*  
223 *elegans*, XXX animals have a dumpy phenotype because of dosage compensation  
224 defects (Hodgkin, 1979; Vargas et al., 2017).

225

226 About a quarter of the offspring of a cross between a XX *Arh-mas-1* pseudomale and  
227 a XX female is XO male (Fig. 3A). Those F1 XO males are likely the result of the  
228 fertilization between an X-bearing sperm and a nullo-oocyte. The formation of a  
229 nullo-oocyte in females is rare, but it occurs in ~3% of the meiosis (Shakes et al.,  
230 2011). Confirming this hypothesis, we found that 23% (N= 57) of the tested F1 males  
231 harbour the paternal X chromosome (Fig. 2F, samples 4, 5). An alternative scenario  
232 for the formation of XO offspring is the fertilization of an X-bearing oocyte by a nullo-  
233 X sperm. This seems to have been the case for the remaining 77% (N=57) of the  
234 cases (Fig. 2F, sample 6), in which F1 males inherited the maternal X chromosome.

235

236 To determine more directly the number of chromosomes in sperm, we examined  
237 spermatocytes stained with the DNA-staining dyes DAPI or Hoechst 33342. In  
238 metaphase plates, in which the number of chromosomes can be quantified, we  
239 confirmed the previous observation that *A. rhodensis* XO males have 6 autosomes  
240 and 1X chromosome (Fig. 3C) (Shakes et al., 2011). In XX pseudomales we  
241 observed cells only with autosomes (0X), or with X chromosomes that varied in  
242 number between 1-4 (Fig. 4C). To identify mature, functional sperm, we used the  
243 cytoskeleton protein Major Sperm Protein (MSP) as a marker. In those cells, the  
244 range of DNA intensity and size of those sperm was broader than in wild-type XO  
245 males (Fig. 3D), confirming the variability in the number of chromosomes in XX  
246 pseudomales. These variations reflect models 1-4 (Fig. 2A) and are useful to test if  
247 the X chromosome guides the partitioning of cytoplasmic components (see below).

248

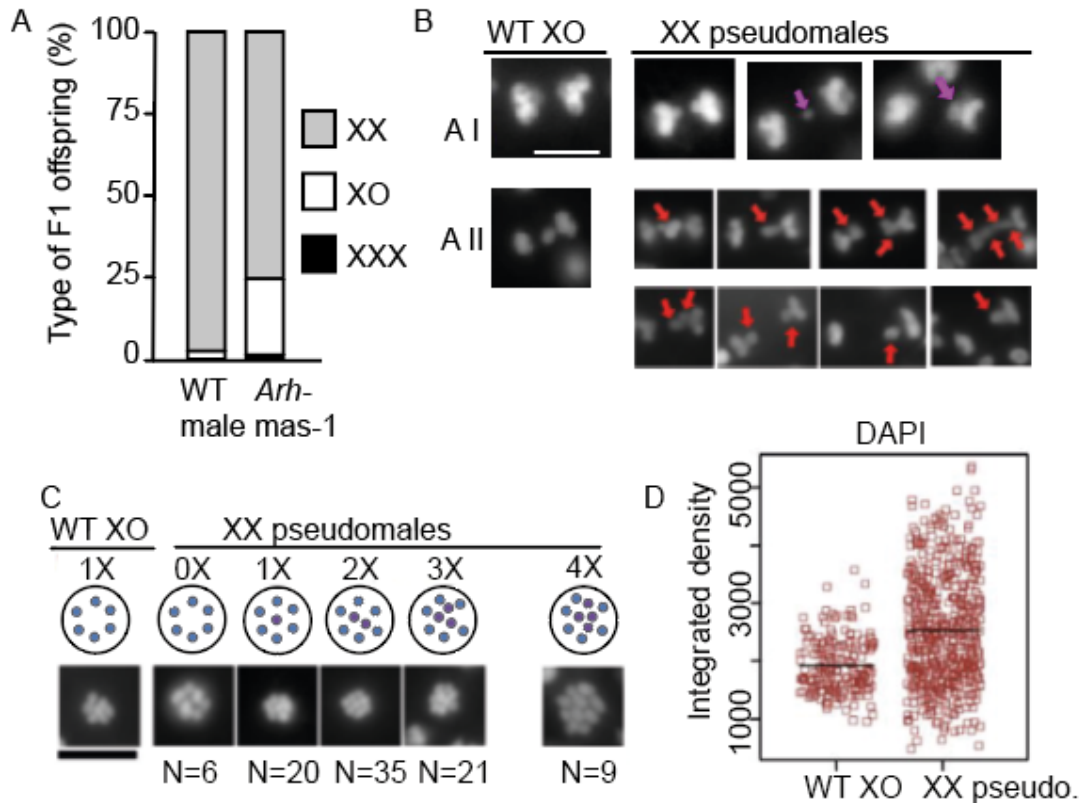

249

250 **Figure 3. Types of F1 offspring after crossing *Arh-mas-1* pseudomales with females.**

251 **(A)** Bar graph representing the proportion of XX animals (females or hermaphrodites), XO

252 (males) and XXX (dumpy). 19 crosses were performed between APS4 wildtype males and

253 females (N= 5629 offspring) and 23 crosses were performed between *Arh-mas-1*

254 pseudomales and APS4 females (N= 3135 offspring). **(B)** Meiosis in wildtype *A. rhodensis*

255 XO males and XX pseudomales. The pink arrow is a lagging chromosome (stained with

256 Hoechst) in anaphase I (A I) and red arrows indicate lagging chromosomes (stained with

257 DAPI) in anaphase II (A II). Scale bar= 5 μm. **(C)** A variable number of chromosomes in

258 metaphase plates, stained with DAPI. N= number of spermatozoa observed for each

259 category, out of a total of 91. **(D)** Quantification of DAPI in MSP-stained sperm.

260

261 **Post-meiotic sperm components co-segregate with the X chromosomes**

262 To examine the pattern of segregation of cytoplasmic components relative to the X

263 chromosome segregation, we performed immunostainings on fixed sperm spreads.

264 We chose cytoplasmic components that are essential for post-meiotic sperm (MSP

265 and mitochondria) and others that are discarded into residual bodies (endoplasmic

266 reticulum, alpha-tubulin and Small Ubiquitin-like Modifier (SUMO)). MSP is a protein

267 contained within organelles called fibrous bodies in spermatocytes and is required in

268 mature sperm for sperm motility (Smith, 2014). SUMO conjugation has been  
269 implicated in a variety of cellular processes (Drabikowski et al., 2018), including the  
270 regulation of meiotic proteins in *C. elegans* (Davis-Roca et al., 2018; Pelisch et al.,  
271 2017). Except for mitochondria and SUMO, we previously described the distribution  
272 of MSP, tubulin and endoplasmic reticulum (ER) in XO *A. rhodensis* spermatocytes  
273 (Shakes et al., 2011; Winter et al., 2017).

274

275 During the first meiotic division in wildtype XO males, there is symmetric segregation  
276 of X chromatids, autosomal homologous chromosomes and all five cytoplasmic  
277 components (Fig. S1A-D). In XX pseudomales, we observe the same pattern of  
278 bipolar distribution for all markers (Fig. S1A-D). Equal partitioning of cytoplasmic  
279 components occurs even when there is asymmetric segregation of chromosomes  
280 (63/194 primary spermatocytes), with one pole receiving more DNA than the other.  
281 During early anaphase II, when the lagging X is not yet in contact with autosomes,  
282 we also observe the equal distribution of cytoplasmic components in XO males and  
283 XX pseudomales for all markers (N= 407 secondary spermatocytes) (Fig. S1A-D).

284

285 In late anaphase II, when the X chromosome is biased towards one of the poles,  
286 asymmetries start to appear for most of the tested cytoplasmic components (Fig. 4).  
287 In wildtype XO animals, microtubules show a dense and elongated shape on the  
288 pole with the X chromosome (Fig. 4A). Similarly, mitochondria and MSP start to  
289 show a polarization towards the side with the X chromosome. The ER, however,  
290 tends to stay in a more central position of the dividing cell (Fig. 4C). SUMO antibody  
291 staining includes labelling of the lagging X chromosome, which is distinctly  
292 asymmetric (Fig. 4D).

293

294 The post-meiotic partitioning stage has the most pronounced asymmetries of  
295 cytoplasmic components. By then, all components are distributed in a unipolar  
296 pattern, with MSP and mitochondria at the pole with the highest DNA content,  
297 whereas tubulin, ER and SUMO with the opposite pattern (Fig. 4A-D). The pattern of  
298 distribution of SUMO in the cortex of the cell to become the residual body is like the  
299 previously described distribution of actin (Winter et al., 2017).

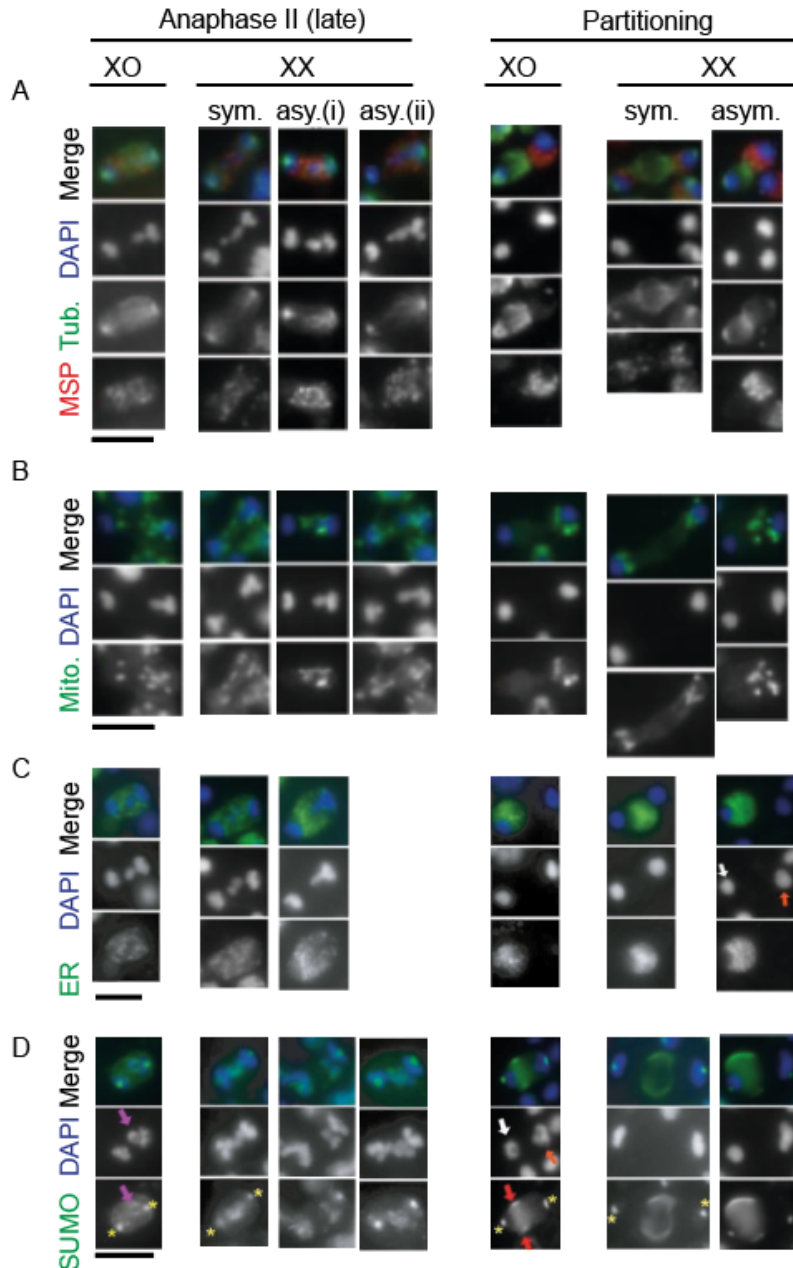

300

301 **Figure 4. Asymmetric distribution of cytoplasmic components.** Sperm spreads of XO  
 302 wildtype males and XX pseudomales stained with antibodies against alpha-tubulin (A), MSP  
 303 (A), mitochondrial beta-subunit of ATP synthase (B), ER-located cyp-33E1 (cytochrome  
 304 P450 family) (C) and SUMO (D). In cells dividing asymmetrically (asym.), they may have one  
 305 (i) or more chromosomes (ii) migrating to opposite poles. The orange and white arrows  
 306 indicate larger and smaller DNA masses, respectively. The red arrows for the SUMO  
 307 antibody staining indicate the expanding cortical bands. The yellow asterisks are  
 308 centrosomes. Scale bar= 5  $\mu$ m.

309

310 In XX pseudomales, X chromosomes segregate symmetrically in 30% of the cases  
311 (N=829), with both poles containing equal amounts of DNA. The remaining cells  
312 (70%, N=829), which segregate DNA asymmetrically, may have one or more  
313 chromosomes segregating to one of the poles. With no exceptions, we observe that  
314 MSP distribution is located around the centre of the symmetrically dividing cells in  
315 the late anaphase II and partitioning phase, but it is unipolar with a bias towards the  
316 side with more DNA in asymmetrically dividing cells (Fig. 4A). Similarly, the  
317 mitochondria distribute equally in cells that divide the chromosomes symmetrically,  
318 but with a bias towards the pole with more DNA (Fig. 4B). In instances in which there  
319 are lagging chromosomes on both sides, but with unequal amounts of DNA (Fig. 4B),  
320 mitochondria partition to both sides but shows a higher prevalence in the pole with  
321 more DNA.

322

323 For the components that are discarded into polar bodies in wildtype XO males  
324 (tubulin, ER, SUMO), in XX pseudomales they follow the predicted patterns of  
325 distributing equally or centrally in cells that divide with equal amounts of DNA. In  
326 asymmetric segregation of DNA, these components partition to the pole with less  
327 DNA. In some of the cells with symmetric amounts of DNA segregation, tubulin is  
328 located centrally in the partitioning phase (Fig. 4A). This is reminiscent of residual  
329 body formation in *C. elegans* (Ward et al., 1983), which forms centrally in this  
330 organism but never in wildtype *A. rhodensis* (Shakes et al., 2011). The ER  
331 distribution in XX pseudomales remains at the centre of symmetrically dividing cells  
332 in both anaphase II and partitioning phase (Fig. 4C). In cells with asymmetric  
333 segregation of chromosomes, the ER distribution concentrates in the pole with less  
334 DNA (Fig. 4C). The SUMO distribution in late anaphase II reflects in large part the  
335 staining of lagging chromosomes, which can be equally partitioned in cells dividing  
336 with equal amounts of DNA or biased towards one of the poles in asymmetrically  
337 dividing cells (Fig. 4D). When partitioning, SUMO localization is in the central part of  
338 the cortex of symmetrically dividing cells, or in the cortex of the cell with less DNA  
339 (Fig. 4D).

340

## 341 **DISCUSSION**

342 The initial observation of a few male offspring derived from *Auanema* male  
343 and female crosses is the result of a modification in spermatogenesis: males discard

344 male-generating spermatids (nullo-X sperm) and promote the production of X-  
345 bearing sperm (Shakes et al., 2011; Winter et al., 2017). This is a mechanism that  
346 generates biased sex ratios, which provides adaptive advantages in certain  
347 ecological circumstances (Van Goor et al., 2021). Here we provide support for the  
348 hypothesis that the X chromosome acts as a signal for an ACD to generate viable X-  
349 bearing sperm cells. The X chromosome would be an example of an intrinsic signal  
350 for polarising cell divisions.

351 Asymmetric segregation of proteins, RNAs and organelles during cell division  
352 occurs in prokaryotes and eukaryotes (Horvitz and Herskowitz, 1992; Inaba and  
353 Yamashita, 2012; Morrison and Kimble, 2006; Sunchu and Cabernard, 2020). In  
354 mitotic cells, biased distribution of cytoplasmic components may result in cells with  
355 different cell fate determinants, organelles and protein aggregates. Previously  
356 reported examples for intrinsic cues include random events (Broadus and Doe,  
357 1997) and co-segregation with organelles that are intrinsically asymmetric (Chen and  
358 Yamashita, 2021).

359 This type of cell division found in *Auanema* spermatogenesis, in which  
360 residual material is partitioned to a cell that contains chromosomes, is atypical in  
361 metazoans (Gorelick et al., 2016). Residual bodies, which are often observed in  
362 ACDs during spermiogenesis, are usually devoid of DNA (Gorelick et al., 2016;  
363 Zakrzewski et al., 2021). There are a few exceptions, such as in the nematode  
364 *Rhabdias*, in which one of the X chromosomes is discarded into a residual body  
365 during the hermaphrodite spermatogenesis (Runey et al., 1978). During residual  
366 body formation In *C. elegans* spermatogenesis, motor proteins (SPE-15, myosin VI;  
367 NMY-2, non-muscle myosin II)(Hu et al., 2019; Kelleher et al., 2000), and a cargo  
368 adaptor protein (GIPC, RGS-GAIP-interacting protein C) (Hu et al., 2019) have been  
369 implicated in the correct segregation of organelles. However, the polarisation signal  
370 for this asymmetric segregation is unknown.

371 Contrary to the canonical meiosis, the unpaired X chromosome in *Auanema*  
372 males separates its sister chromatids already in the first meiotic division (Shakes et  
373 al., 2011; Winter et al., 2017). The result is that each secondary spermatocyte has  
374 an X chromosome. Thus, during cell division of these cells, there is potential for the  
375 X chromosome to act as a polarising signal. Such a scenario does not occur in *C.*  
376 *elegans* males (Fig. 1), as this nematode follows the canonical meiosis (reviewed in  
377 (Chu and Shakes, 2013)): each secondary spermatocyte will either have the X



378 chromosome or not. When the secondary spermatocytes divide, each daughter cell  
379 will contain the same chromosomal content (either with an X or without) as the  
380 parental cell. Therefore, the polarisation mechanisms for the correct partition of  
381 cytoplasmic content for the residual bodies is likely to be different in *C. elegans*.

382 The mechanism by which the X chromosome may act as a polarising cue in  
383 *Auanema* is still unclear. It is possible, for instance, that a secondary nucleation  
384 centre for cytoskeleton proteins, such as non-centrosomal microtubule-organising  
385 centres, emanate from the X chromosome (Sanchez and Feldman, 2017). Further  
386 genetics studies, as well as electron microscopy and live-cell imaging will help to  
387 elucidate the possible mechanisms.

388

389

### 390 **ACKNOWLEDGEMENTS**

391 A.P.-d.S. was supported by a grant from Leverhulme Trust (RPG-2019-329). The *E.*  
392 *coli* strain was provided by the CGC, which is funded by NIH Office of Research  
393 Infrastructure Programs (P40 OD010440). D.C.S. was supported by a grant from the  
394 National Science Foundation ([IOS 1122101](#)).

395

396

### 397 **REFERENCES**

- 398 Broadus, J., Doe, C.Q., 1997. Extrinsic cues, intrinsic cues and microfilaments  
399 regulate asymmetric protein localization in *Drosophila* neuroblasts. *Curr Biol* 7,  
400 827-835.
- 401 Chaudhuri, J., Bose, N., Tandonnet, S., Adams, S., Zuco, G., Kache, V., Parihar, M.,  
402 von Reuss, S.H., Schroeder, F.C., Pires-daSilva, A., 2015. Mating dynamics in  
403 a nematode with three sexes and its evolutionary implications. *Sci Rep* 5,  
404 17676.
- 405 Chaudhuri, J., Kache, V., Pires-daSilva, A., 2011a. Regulation of sexual plasticity in  
406 a nematode that produces males, females, and hermaphrodites. *Curr Biol* 21,  
407 1548-1551.
- 408 Chaudhuri, J., Parihar, M., Pires-daSilva, A., 2011b. An introduction to worm lab:  
409 from culturing worms to mutagenesis. *J Vis Exp*.
- 410 Chen, C., Yamashita, Y.M., 2021. Centrosome-centric view of asymmetric stem cell  
411 division. *Open Biology* 11, 200314.

- 412 Chu, D.S., Shakes, D.C., 2013. Spermatogenesis. *Adv Exp Med Biol* 757, 171-203.
- 413 Davis-Roca, A.C., Divekar, N.S., Ng, R.K., Wignall, S.M., 2018. Dynamic SUMO  
414 remodeling drives a series of critical events during the meiotic divisions in  
415 *Caenorhabditis elegans*. *PLoS Genet* 14, e1007626.
- 416 Drabikowski, K., Ferralli, J., Kistowski, M., Oledzki, J., Dadlez, M., Chiquet-  
417 Ehrismann, R., 2018. Comprehensive list of SUMO targets in *Caenorhabditis*  
418 *elegans* and its implication for evolutionary conservation of SUMO signaling.  
419 *Sci Rep* 8, 1139.
- 420 Fabig, G., Kiewisz, R., Lindow, N., Powers, J.A., Cota, V., Quintanilla, L.J., Brugues,  
421 J., Prohaska, S., Chu, D.S., Muller-Reichert, T., 2020. Male meiotic spindle  
422 features that efficiently segregate paired and lagging chromosomes. *eLife* 9,  
423 e50988.
- 424 Freisinger, T., Klunder, B., Johnson, J., Muller, N., Pichler, G., Beck, G., Costanzo,  
425 M., Boone, C., Cerione, R.A., Frey, E., Wedlich-Soldner, R., 2013.  
426 Establishment of a robust single axis of cell polarity by coupling multiple  
427 positive feedback loops. *Nat Commun* 4, 1807.
- 428 Fuller, M.T., Spradling, A.C., 2007. Male and female *Drosophila* germline stem cells:  
429 two versions of immortality. *Science* 316, 402-404.
- 430 Gönczy, P., 2008. Mechanisms of asymmetric cell division: flies and worms pave the  
431 way. *Nat Rev Mol Cell Biol* 9, 355-366.
- 432 Gorelick, R., Carpinone, J., Derraugh, L.J., 2016. No universal differences between  
433 female and male eukaryotes: anisogamy and asymmetrical female meiosis.  
434 *Biological Journal of the Linnean Society* 120, 1-21.
- 435 Hill, R.C., Egydio de Carvalho, C., Salogiannis, J., Schlager, B., Pilgrim, D., Haag,  
436 E.S., 2006. Genetic flexibility in the convergent evolution of hermaphroditism in  
437 *Caenorhabditis* nematodes. *Dev Cell* 10, 531-538.
- 438 Hodgkin, J., 1979. Nondisjunction mutants of the nematode *Caenorhabditis elegans*.  
439 *Genetics* 91, 67-94.
- 440 Horvitz, H.R., Herskowitz, I., 1992. Mechanisms of asymmetric cell division: two Bs  
441 or not two Bs, that is the question. *Cell* 68, 237-255.
- 442 Hu, J., Cheng, S., Wang, H., Li, X., Liu, S., Wu, M., Liu, Y., Wang, X., 2019. Distinct  
443 roles of two myosins in *C. elegans* spermatid differentiation. *PLOS Biology* 17,  
444 e3000211.

- 445 Inaba, M., Yamashita, Y.M., 2012. Asymmetric stem cell division: precision for  
446 robustness. *Cell Stem Cell* 11, 461-469.
- 447 Kanzaki, N., Kiontke, K., Tanaka, R., Hirooka, Y., Schwarz, A., Muller-Reichert, T.,  
448 Chaudhuri, J., Pires-daSilva, A., 2017. Description of two three-gendered  
449 nematode species in the new genus *Auanema* (Rhabditina) that are models for  
450 reproductive mode evolution. *Sci Rep* 7, 11135.
- 451 Kelleher, J.F., Mandell, M.A., Moulder, G., Hill, K.L., L'Hernault, S.W., Barstead, R.,  
452 Titus, M.A., 2000. Myosin VI is required for asymmetric segregation of cellular  
453 components during *C. elegans* spermatogenesis. *Curr Biol* 10, 1489-1496.
- 454 Knoblich, J.A., 2010. Asymmetric cell division: recent developments and their  
455 implications for tumour biology. *Nat Rev Mol Cell Biol* 11, 849-860.
- 456 Morrison, S.J., Kimble, J., 2006. Asymmetric and symmetric stem-cell divisions in  
457 development and cancer. *Nature* 441, 1068-1074.
- 458 Neumuller, R.A., Knoblich, J.A., 2009. Dividing cellular asymmetry: asymmetric cell  
459 division and its implications for stem cells and cancer. *Genes Dev* 23, 2675-  
460 2699.
- 461 Pelisch, F., Tammsalu, T., Wang, B., Jaffray, E.G., Gartner, A., Hay, R.T., 2017. A  
462 SUMO-Dependent Protein Network Regulates Chromosome Congression  
463 during Oocyte Meiosis. *Mol Cell* 65, 66-77.
- 464 Pires-daSilva, A., Sommer, R.J., 2004. Conservation of the global sex determination  
465 gene *tra-1* in distantly related nematodes. *Genes Dev* 18, 1198-1208.
- 466 Runey, W.M., Runey, G.L., Lauter, F.H., 1978. Gametogenesis and fertilization in  
467 *Rhabdias ranae* Walton 1929: I. The parasitic hermaphrodite. *J Parasitol* 64,  
468 1008-1014.
- 469 Sanchez, A.D., Feldman, J.L., 2017. Microtubule-organizing centers: from the  
470 centrosome to non-centrosomal sites. *Current Opinion in Cell Biology* 44, 93-  
471 101.
- 472 Shakes, D.C., Neva, B.J., Huynh, H., Chaudhuri, J., Pires-daSilva, A., 2011.  
473 Asymmetric spermatocyte division as a mechanism for controlling sex ratios.  
474 *Nat Commun* 2, 157.
- 475 Smith, H.E., 2014. Nematode sperm motility. *WormBook*, 1-15.
- 476 Stiernagle, T., 2006. Maintenance of *C. elegans*. *WormBook*, 1-11.
- 477 Sunchu, B., Cabernard, C., 2020. Principles and mechanisms of asymmetric cell  
478 division. *Development* 147.

- 479 Tandonnet, S., Farrell, M.C., Koutsovoulos, G.D., Blaxter, M.L., Parihar, M., Sadler,  
480 P.L., Shakes, D.C., Pires-daSilva, A., 2018. Sex- and gamete-specific patterns  
481 of X chromosome segregation in a trioecious nematode. *Curr Biol* 28, 93-99  
482 e93.
- 483 Tandonnet, S., Koutsovoulos, G.D., Adams, S., Cloarec, D., Parihar, M., Blaxter,  
484 M.L., Pires-daSilva, A., 2019. Chromosome-wide evolution and sex  
485 determination in the three-sexed nematode *Auanema rhodensis*. *G3:  
486 Genes|Genomes|Genetics* 9, 1211-1230.
- 487 Van Goor, J., Herre, E.A., Gomez, A., Nason, J.D., 2021. Extraordinarily precise  
488 nematode sex ratios: Adaptive responses to vanishingly rare mating options.  
489 *bioRxiv*, 2021.2005.2025.445688.
- 490 Vargas, E., McNally, K., Friedman, J.A., Cortes, D.B., Wang, D.Y., Korf, I.F.,  
491 McNally, F.J., 2017. Autosomal Trisomy and Triploidy Are Corrected During  
492 Female Meiosis in *Caenorhabditis elegans*. *Genetics* 207, 911-922.
- 493 Venkei, Z.G., Yamashita, Y.M., 2018. Emerging mechanisms of asymmetric stem  
494 cell division. *J Cell Biol* 217, 3785-3795.
- 495 Ward, S., Hogan, E., Nelson, G.A., 1983. The initiation of spermiogenesis in the  
496 nematode *Caenorhabditis elegans*. *Dev Biol* 98, 70-79.
- 497 Winter, E.S., Schwarz, A., Fabig, G., Feldman, J.L., Pires-daSilva, A., Muller-  
498 Reichert, T., Sadler, P.L., Shakes, D.C., 2017. Cytoskeletal variations in an  
499 asymmetric cell division support diversity in nematode sperm size and sex  
500 ratios. *Development* 144, 3253-3263.
- 501 Zakrzewski, P., Lenartowska, M., Buss, F., 2021. Diverse functions of myosin VI in  
502 spermiogenesis. *Histochem Cell Biol* 155, 323-340.
- 503
- 504

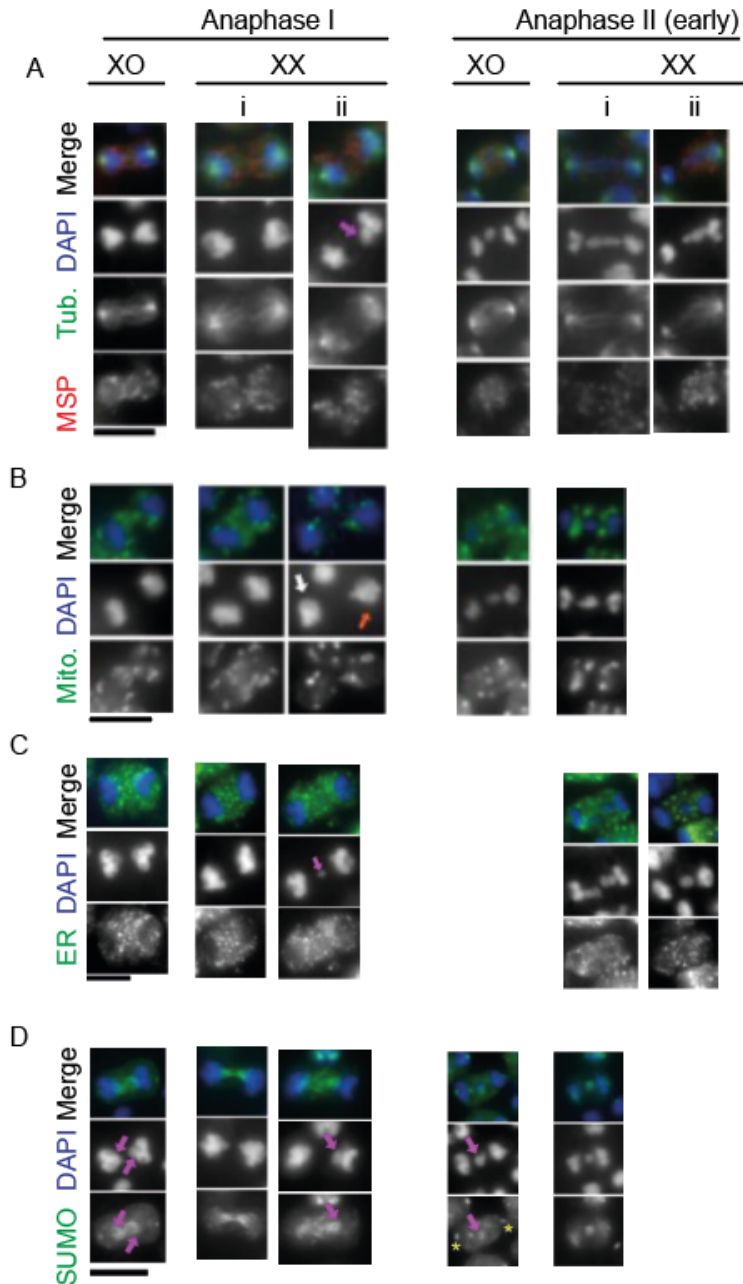

505

506

507 **Supplemental Figure 1. Cytoplasmic components segregate symmetrically in**

508 **anaphase I and early anaphase II.** In wildtype XO males and XX pseudomales, the

509 cytoplasmic components MSP (A), alpha-tubulin (A), mitochondria (B), endoplasmic

510 reticulum (ER) (C) and SUMO (D) distribute equally to both poles of the dividing

511 spermatocytes. The pink arrow indicates lagging chromosomes, whereas the red and white

512 arrows indicate larger and smaller DNA masses, respectively. Scale bar= 5  $\mu$ m.

513

514
